# Supplementary material
Source: Springer Nature journal article supplement (https://www.springermedizin.de/resource/supplementary/12931_2010_1038_MOESM8_ESM.pdf/9425426)

**A****TNF $\alpha$** 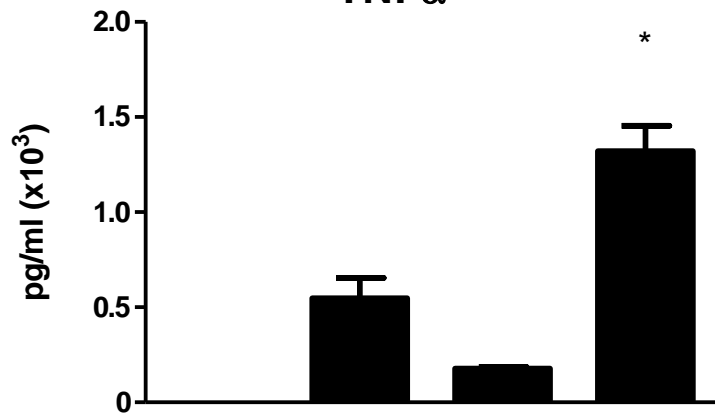

|         |  |   |   |   |
|---------|--|---|---|---|
| LPS     |  | + |   | + |
| sICAM-1 |  |   | + | + |

**B****MIP2**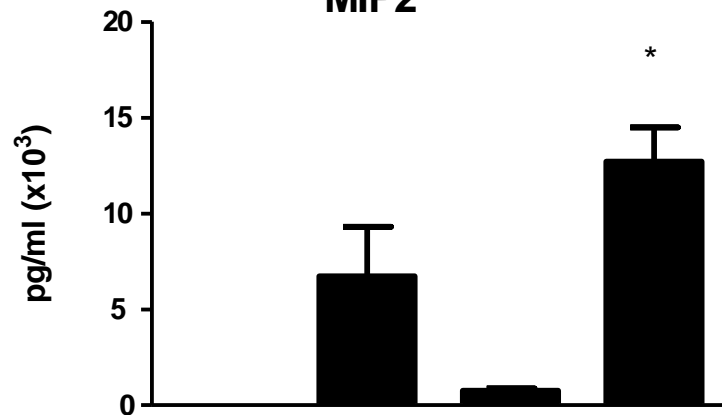

|         |  |   |   |   |
|---------|--|---|---|---|
| LPS     |  | + |   | + |
| sICAM-1 |  |   | + | + |

Supplement: MOESM8 [file 9425426]
